# Supplementary material for: A diruthenium soft ferromagnet showing Tc = 3.0 K: Mn4(H2O)16H[Ru2(CO3)4]2[Ru2(CO3)4(H2O)2]·11H2O
Source: Royal Society of Chemistry journal article supplement (doi:10.1039/c2dt00048b), 2012-01-01
Supplement: c2dt00048b.pdf [file c2dt00048b.pdf]

## Supplementary materials

### A diruthenium soft ferromagnet showing $T_c = 3.0$ K

### $\text{Mn}_4(\text{H}_2\text{O})_{16}\text{H}[\text{Ru}_2(\text{CO}_3)_4]_2[\text{Ru}_2(\text{CO}_3)_4(\text{H}_2\text{O})_2]\cdot 11\text{H}_2\text{O}$

Bin Liu,<sup>\*</sup> Jin Jin<sup>†</sup> Xue-Mei Liu, Tuo Ding, Na Zhang, Yan-Yan Jia, Gang-Lin Xue<sup>\*</sup>

Key Laboratory of Synthetic and Natural Functional Molecule Chemistry of Ministry of Education, College of Chemistry & Materials Science, Northwest University, Xi'an 710069, P. R. China

Crystal data for **1**:  $\text{C}_{12}\text{H}_{59}\text{O}_{65}\text{Mn}_4\text{Ru}_6$ ,  $M_r = 2069.77$ , red-brown plate, Monoclinic, space group P21/c,  $a = 13.664(3)$  Å,  $b = 13.618(3)$  Å,  $c = 16.954(3)$  Å,  $\beta = 110.74(3)^\circ$ ,  $V = 2950.3(10)$  Å<sup>3</sup>,  $Z = 2$ ,  $\rho_{\text{calcd}} = 2.330$  g cm<sup>-3</sup>,  $(\text{Mo K}\alpha) = 2.455$  mm. A single crystal of dimensions  $0.25 \times 0.10 \times 0.10$  mm<sup>3</sup> for **1** was selected for indexing and intensity data collection on a Rigaku SCX mini CCD diffractometer using graphite-monochromatized Mo K $\alpha$  radiation ( $\lambda = 0.71073$  Å) at room temperature. Numbers of collected and observed independent [ $I > 2\sigma(I)$ ] reflections are 29983 and 6113 ( $R_{\text{int}} = 0.040$ ). Full matrix least-squares refinements were based on F2 and converged at  $R_1 = 0.0395$  and  $wR_2 = 0.0889$ . GOOF = 1.160. The eight coordination water H atoms were located in a difference Fourier map and refined with restrained O-H bond lengths [ $0.85(2)$  Å] and fixed isotropic displacement parameters [ $U(\text{iso})\text{H} = 1.5U(\text{eq})\text{O}$ ].

**Table S1.** Selected bond lengths [Å] and angles (deg) for **1**

|          |           |          |          |
|----------|-----------|----------|----------|
| Ru1-Ru1E | 2.2575(8) | Ru3-O17  | 2.028(4) |
| Ru1-O1   | 2.023(4)  | Ru3-O16G | 2.019(5) |
| Ru1-O4   | 2.018(4)  | Ru3-O18G | 2.027(4) |
| Ru1-O7   | 2.310(5)  | Mn1-O13  | 2.196(6) |
| Ru1-O2E  | 2.037(4)  | Mn1-O20  | 2.191(6) |
| Ru1-O5E  | 2.035(4)  | Mn1-O21  | 2.163(8) |
| Ru2-Ru2F | 2.2588(8) | Mn1-O22  | 2.172(7) |

|               |            |              |           |
|---------------|------------|--------------|-----------|
| Ru2-O6        | 2.264(4)   | Mn1-O23      | 2.221(7)  |
| Ru2-O8        | 2.028(5)   | Mn1-O19      | 2.187(6)  |
| Ru2-O11G      | 2.026(5)   | Mn2-O15      | 2.121(5)  |
| Ru2-O9F       | 2.016(5)   | Mn2-O24      | 2.176(7)  |
| Ru2-O12A      | 2.029(5)   | Mn2-O25      | 2.240(6)  |
| Ru3-Ru3G      | 2.2570(8)  | Mn2-O26      | 2.187(8)  |
| Ru3-O3        | 2.261(4)   | Mn2-O27      | 2.225(6)  |
| Ru3-O14       | 2.029(5)   | Mn2-O10C     | 2.167(4)  |
| O1-Ru1-O4     | 88.76(17)  | O13-Mn1-O20  | 97.0(2)   |
| O1-Ru1-O7     | 83.38(17)  | O13-Mn1-O21  | 85.9(3)   |
| Ru1E-Ru1-O1   | 89.46(10)  | O13-Mn1-O22  | 86.6(2)   |
| O1-Ru1-O2E    | 179.50(17) | O13-Mn1-O23  | 94.5(2)   |
| O1-Ru1-O5E    | 91.19(17)  | O13-Mn1-O19  | 167.7(2)  |
| O4-Ru1-O7     | 88.31(17)  | O19-Mn1-O20  | 92.8(2)   |
| Ru1E-Ru1-O4   | 90.11(10)  | O19-Mn1-O21  | 86.5(3)   |
| O2E-Ru1-O4    | 90.74(17)  | O19-Mn1-O22  | 84.4(2)   |
| O4-Ru1-O5E    | 179.92(18) | O19-Mn1-O23  | 94.0(3)   |
| Ru1E-Ru1-O7   | 172.70(15) | O20-Mn1-O21  | 90.2(3)   |
| O2E-Ru1-O7    | 96.63(17)  | O20-Mn1-O22  | 173.6(2)  |
| O5E-Ru1-O7    | 91.63(17)  | O20-Mn1-O23  | 84.3(2)   |
| Ru1E-Ru1-O2E  | 90.52(10)  | O21-Mn1-O22  | 95.3(3)   |
| Ru1E-Ru1-O5E  | 89.96(10)  | O21-Mn1-O23  | 174.5(3)  |
| O2E-Ru1-O5E   | 89.31(17)  | O22C-Mn1-O23 | 90.1(3)   |
| O6-Ru2-O8     | 88.98(16)  | O15-Mn2-O24  | 177.2(2)  |
| O6-Ru2-O12A   | 84.98(16)  | O15-Mn2-O25  | 86.0(2)   |
| Ru2F-Ru2-O6   | 174.74(10) | O15-Mn2-O26  | 91.8(3)   |
| O6-Ru2-O9F    | 91.27(16)  | O15-Mn2-O27  | 90.2(2)   |
| O6-Ru2-O11G   | 95.42(16)  | O10C-Mn2-O15 | 91.1(2)   |
| O8-Ru2-O12A   | 89.98(19)  | O24-Mn2-O25  | 94.2(3)   |
| Ru2F-Ru2-O8   | 90.13(12)  | O24-Mn2-O26  | 87.9(3)   |
| O8-Ru2-O9F    | 179.6(2)   | O24-Mn2-O27  | 87.0(2)   |
| O8-Ru2-O11G   | 90.85(19)  | O10C-Mn2-O24 | 91.7(2)   |
| Ru2F-Ru2-O12A | 89.84(12)  | O25-Mn2-O26  | 176.9(3)  |
| O9F-Ru2-O12A  | 90.41(19)  | O25-Mn2-O27  | 86.3(2)   |
| O11G-Ru2-O12A | 179.08(19) | O10C-Mn2-O25 | 89.13(19) |
| Ru2F-Ru2-O9F  | 89.65(12)  | O26-Mn2-O27  | 91.6(2)   |
| Ru2F-Ru2-O11G | 89.77(12)  | O10C-Mn2-O26 | 93.0(2)   |
| O9F-Ru2-O11G  | 88.76(19)  | O10C-Mn2-O27 | 175.1(2)  |
| O3-Ru3-O14    | 88.11(16)  | Ru1-O1-C1    | 120.7(3)  |
| O3-Ru3-O17    | 85.97(16)  | Ru1E-O2-C1   | 119.1(4)  |
| Ru3G-Ru3-O3   | 175.33(10) | Ru3-O3-C1    | 134.1(3)  |
| O3-Ru3-O16G   | 91.96(16)  | Ru1-O4-C2    | 119.9(3)  |
| O3-Ru3-O18G   | 94.29(16)  | Ru1E-O5-C2   | 119.3(3)  |

|                |            |             |          |
|----------------|------------|-------------|----------|
| O14-Ru3-O17    | 91.21(18)  | Ru2-O6-C2   | 133.2(3) |
| Ru3G-Ru3-O14   | 89.94(13)  | Ru2-O8-C3   | 118.9(4) |
| O14-Ru3-O16G   | 179.85(19) | Ru2F-O9-C3  | 120.4(4) |
| O14-Ru3-O18G   | 89.92(18)  | Ru2G-O11-C4 | 120.3(4) |
| Ru3G-Ru3-O17   | 89.83(13)  | Ru2B-O12-C4 | 119.7(3) |
| O16G-Ru3-O17   | 88.67(18)  | Ru3-O14-C5  | 120.1(4) |
| O17-Ru3-O18G   | 178.85(18) | Ru3G-O16-C5 | 120.3(4) |
| Ru3G-Ru3-O16G  | 89.98(13)  | Ru3-O17-C6  | 120.3(4) |
| Ru3G-Ru3-O18G  | 89.95(13)  | Ru3G-O18-C6 | 120.3(4) |
| O16G-Ru3 -O18G | 90.20(18)  | Mn1-O19-C6  | 131.4(5) |
|                |            | Mn1-O13-C4  | 123.1(4) |
|                |            | Mn2-O15-C5  | 136.0(5) |
|                |            | Mn2D-O10-C3 | 124.8(4) |

Symmetry transformations used to generate equivalent atoms: A:  $-1+x, 1+y, z$ , B:  $1+x, -1+y, z$ , C:  $1-x, -1/2+y, 3/2-z$ , D:  $1-x, 1/2+y, 3/2-z$ , E:  $-x, 1-y, 1-z$ , F:  $-x, 2-y, 1-z$ , G:  $1-x, 1-y, 1-z$ .

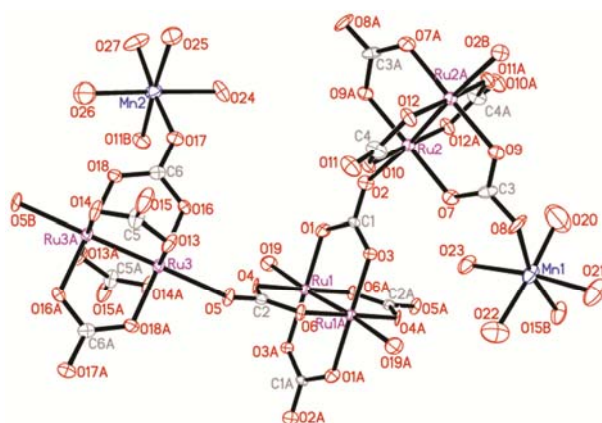

**Figure S1.** ORTEP diagram showing the coordination environment of **1** with thermal ellipsoids at 30% probability. All H atoms are omitted for clarity. Symmetry transformations used to generate equivalent atoms for **1**: A:  $-1+x, 1+y, z$ , B:  $1+x, -1+y, z$ , C:  $1-x, -1/2+y, 3/2-z$ , D:  $1-x, 1/2+y, 3/2-z$ , E:  $-x, 1-y, 1-z$ , F:  $-x, 2-y, 1-z$ , G:  $1-x, 1-y, 1-z$ .

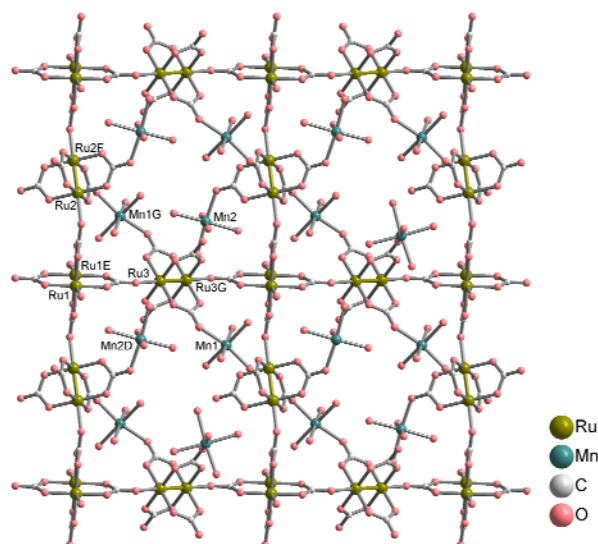

**Figure S2.** Perspective views of the 2D layer with the (4,4) net-work  $[\text{Ru}_2(\text{CO}_3)_4]_n^{3n-}$  and  $\text{Mn}(\text{H}_2\text{O})_4^{2+}$  cations bridges in the *ab* plane. Symmetry transformations used to generate equivalent atoms for **1**: A:  $-1+x, 1+y, z$ , B:  $1+x, -1+y, z$ , C:  $1-x, -1/2+y, 3/2-z$ , D:  $1-x, 1/2+y, 3/2-z$ , E:  $-x, 1-y, 1-z$ , F:  $-x, 2-y, 1-z$ , G:  $1-x, 1-y, 1-z$ .

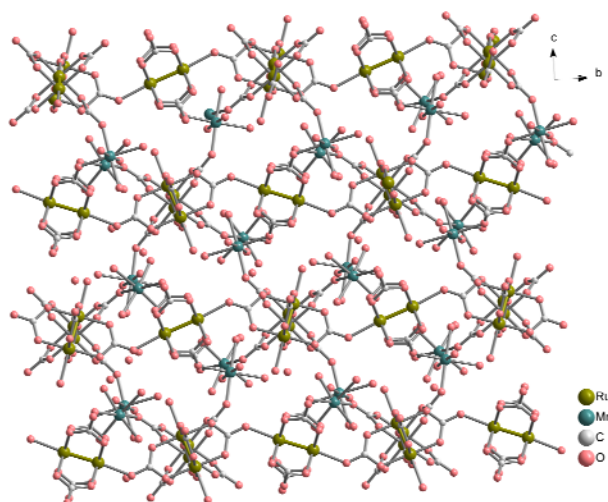

**Figure S3.** Packing diagram of complex **1** in the *bc* plane. The hydrogen atoms and lattice water molecules are omitted.

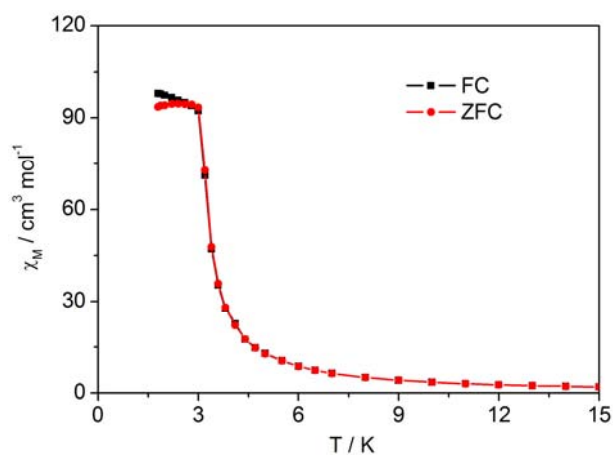

**Figure S4.** Plots of field-cooled magnetization (FCM, ■) and zero-field-cooled magnetization (ZFCM, ●) vs temperature measured at 30 Oe for complex **1**.

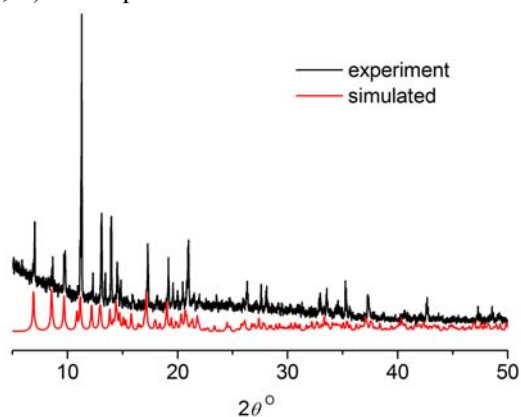

**Figure S4.** Comparison of XRPD pattern from the single-crystal structure determination and as-synthesized product of complex **1**
